# Supplementary material
Source: PubMed Central journal article supplement (PMC5776978)
Supplement: pnas.201714313SI.pdf [file pnas.201714313SI.pdf]

# Supporting Information

Khan et al. 10.1073/pnas.1714313114

## SI Materials and Methods

**Generation of *Gnas*<sup>R201H</sup> Conditional "Knockin" Mice.** The BAC clone RPCI23-312C1 containing the *Gnas* gene was purchased from Invitrogen. As shown in Fig. S1, a DNA fragment containing exons 4 to 12 of the *Gnas* gene was retrieved from the BAC clone and inserted into the targeting vector using a recombineering method. Next, we cloned a minigene cassette containing a 250-bp upstream sequence of exon 7, a partial cDNA sequence containing exons 7 to 12, and three consecutive polyA sequences. The minigene cassette was inserted into intron 6 of the *Gnas* gene and flanked by LoxP sequences. The mutation in exon 8 corresponding to human R201H was generated by changing a single nucleotide (CGT to CAT). The targeting vector containing the wild-type minigene cassette and the FD mutation was used in mouse ES cells along with Cas9 and a guide RNA to increase targeting efficiency. Correctly targeted ES clones were identified by both 5' and 3' long-range PCR, and sequencing and mouse lines were generated by blastocyst injection of the targeted ES cells according to standard protocols. One of the correctly targeted ES clones was used to generate the *Gnas*<sup>f(R201H)</sup> mice, and two independent founder lines gave rise to the same phenotypes in subsequent experiments.

***Gnas*<sup>f(R201H)</sup> Genotyping PCR.** PCR amplification of the conditional allele and wild-type allele was done in the same reaction mixture using the following primers: forward-1, ATGCGGCGGCCA-CTTTGCCTTTTGCAGGACTGAG; forward-2, CTTTGGG-GATCACACCACTT; and reverse, AGCTTGGCGTGAAGTTC-CTATTCTC. PCR amplification conditions used were as follows: step 1, 94 °C for 3 min; step 2, 94 °C for 30 s; step 3, 58 °C for 30 s; step 4, 72 °C for 1 min; and step 5, cycle 35 times to step 2.

**μCT Scanning.** μCT scanning of long bones was performed using a SCANCO μCT 35.

**Tamoxifen Injection.** Tamoxifen (1 mg) was injected into the lactating mother in our *Sox9CreER*; *Rosa26Tdtomato*; *Gnas*<sup>f(R201H)</sup> mating at postnatal day 5 (P5), and the pups were collected at P21 for analysis.

**Skeletal Preparation: Alizarin Red and Alcian Blue Staining.** Embryos were harvested and skinned carefully. Internal organs were then

eviscerated, and the embryos were placed in 100% ethanol overnight. Staining was performed according to previously described protocol (18).

**von Kossa Staining.** Paraffin sections were deparaffinized in xylene and hydrated in distilled water. Then a 5% silver nitrate solution was added to the slides and placed under a 60-W lamp for 1 h. Slides were rinsed three times in distilled water. Sodium thiosulfate (5%) was added to the slides for 5 min. Slides were rinsed three times in distilled water and counterstained with nuclear fast red for 5 min. Slides were rinsed three times in distilled water and then dehydrated and cleared in xylene before mounting with Permount.

**Alkaline Phosphatase and Alizarin Red Staining.** Cells were rinsed with PBS and fixed with 4% paraformaldehyde at room temperature for 10 to 15 min. After washing with PBS, cells were stained with NBT/BCIP (nitro-blue tetrazolium chloride/5-bromo-4-chloro-3'-indolylphosphate p-toluidine salt) (purchased from Thermo Fisher Scientific; 34042) for alkaline phosphatase activities or with 1% alizarin red (pH 4.2) in water for 20 min followed by PBS washing (three times). Quantification of alizarin red staining was performed as described before (71).

**Antibodies Used for Immunohistochemistry.** Osx (ab22552; Abcam), Opn (AF808; R&D), Col10 (X-AC9; DSHB), αSMA (A5228; Sigma), CD31 (550274; BD Biosciences), p-Creb (06-519; Millipore), and β-catenin (610154; BD Biosciences).

**Antibodies Used for Western Blotting.** Gα<sub>s</sub> (sc-55546; Santa Cruz Biotechnology), Creb (sc-25785; Santa Cruz), p-Creb (06-519; Millipore), β-catenin (610154; BD Biosciences), αSMA (A5228; Sigma), Gapdh (G8795; Sigma), and α/β-tubulin (2148; Cell Signaling Technology) according to the manufacturers' recommendations.

**Quantitative Real-Time PCR.** qRT-PCR was performed with SYBR Green Real-Time PCR Master Mix purchased from Thermo Fisher Scientific. Primer pairs used in this study are listed in Table S1.



**A**

|                 |                                                                                  |      |      |      |      |      |      |      |  |
|-----------------|----------------------------------------------------------------------------------|------|------|------|------|------|------|------|--|
|                 | 2650                                                                             | 2660 | 2670 | 2680 | 2690 | 2700 | 2710 | 2720 |  |
| Mouse GNAS mRNA | TTCCACCTGAATTCATGAGCATGCCAAGGCTCTGTGGGAGGATGAGGGAGTGCCTGCCTGCTACGAGCGCTCCAATGA   | 2720 |      |      |      |      |      |      |  |
| hGNAS mRNA      | TTCCCTCCCGAATTCATGAGCATGCCAAGGCTCTGTGGGAGGATGAAGGAGTGCCTGCCTGCTACGAAACGCTCCAACGA | 503  |      |      |      |      |      |      |  |
| Majority        | GTACCAGCTGATTGACTGTGCCAGTACTTCTGGACAAGATXGAXGTGATCAAGCAGGCGXGACTAXGTGCCXAGXGAXC  |      |      |      |      |      |      |      |  |
|                 | 2730                                                                             | 2740 | 2750 | 2760 | 2770 | 2780 | 2790 | 2800 |  |
| Mouse GNAS mRNA | GTACCAGCTGATTGACTGTGCCAGTACTTCTGGACAAGATGATGTGATCAAGCAGGCGGACTACGTGCCAAGTGACC    | 2800 |      |      |      |      |      |      |  |
| hGNAS mRNA      | GTACCAGCTGATTGACTGTGCCAGTACTTCTGGACAAGATGCAGCTGATCAAGCAGGCTGACTATGTGCCGAGCGATC   | 583  |      |      |      |      |      |      |  |
| Majority        | AGGACCTGCTTCGCTGCCGTGTCTGACTTCTGGAATCTTTGAGACCAAGTCCAGGTGGACAAAGTCAACTTCCACATG   |      |      |      |      |      |      |      |  |
|                 | 2810                                                                             | 2820 | 2830 | 2840 | 2850 | 2860 | 2870 | 2880 |  |
| Mouse GNAS mRNA | AGGACCTGCTTCGCTGCCGTGTCTGACTTCTGGAATCTTTGAGACCAAGTCCAGGTGGACAAAGTCAACTTCCACATG   | 2880 |      |      |      |      |      |      |  |
| hGNAS mRNA      | AGGACCTGCTTCGCTGCCGTGTCTGACTTCTGGAATCTTTGAGACCAAGTCCAGGTGGACAAAGTCAACTTCCACATG   | 663  |      |      |      |      |      |      |  |
| Majority        | TTXGAXGTGGGXGGCCAGCGCGATGAXCGCCGCAAGTGGATCCAGTGCTTCAAXGATGTGACTGCCATCATCTTCGTGGT |      |      |      |      |      |      |      |  |
|                 | 2890                                                                             | 2900 | 2910 | 2920 | 2930 | 2940 | 2950 | 2960 |  |
| Mouse GNAS mRNA | TTGATGTGGCGGCCAGCGCGATGAGCGCCGCAAGTGGATCCAGTGCTTCAATGATGTGACTGCCATCATCTTCGTGGT   | 2960 |      |      |      |      |      |      |  |
| hGNAS mRNA      | TTGATGTGGTGGCCAGCGCGATGAACGCCGCAAGTGGATCCAGTGCTTCAACGATGTGACTGCCATCATCTTCGTGGT   | 743  |      |      |      |      |      |      |  |
| Majority        | GGCCAGCAGCAGCTACAACATGGTCATXCGGGAGGACAAACAGACXAAACCGCTGCAGGAGGCTCTGAACCTCTTCAAGA |      |      |      |      |      |      |      |  |
|                 | 2970                                                                             | 2980 | 2990 | 3000 | 3010 | 3020 | 3030 | 3040 |  |
| Mouse GNAS mRNA | GGCCAGCAGCAGCTACAACATGGTCATXCGGGAGGACAAACAGACTAACCGCTGCAGGAGGCTCTGAACCTCTTCAAGA  | 3040 |      |      |      |      |      |      |  |
| hGNAS mRNA      | GGCCAGCAGCAGCTACAACATGGTCATXCGGGAGGACAAACAGACCAACCGCTGCAGGAGGCTCTGAACCTCTTCAAGA  | 823  |      |      |      |      |      |      |  |
| Majority        | GCATCTGGAACAACAGATGGCTGCGCACCATCTCTGTGATXCTXTTCTCAACAAGCAAGAXCTGCTXGCTGAGAAAGTC  |      |      |      |      |      |      |      |  |
|                 | 3050                                                                             | 3060 | 3070 | 3080 | 3090 | 3100 | 3110 | 3120 |  |
| Mouse GNAS mRNA | GCATCTGGAACAACAGATGGCTGCGCACCATCTCTGTGATXCTXTTCTCAACAAGCAAGAXCTGCTXGCTGAGAAAGTC  | 3120 |      |      |      |      |      |      |  |
| hGNAS mRNA      | GCATCTGGAACAACAGATGGCTGCGCACCATCTCTGTGATXCTXTTCTCAACAAGCAAGATGCTGCTGCTGAGAAAGTC  | 903  |      |      |      |      |      |      |  |

**B**

|               |                                                                       |      |      |      |      |      |      |  |
|---------------|-----------------------------------------------------------------------|------|------|------|------|------|------|--|
|               | IDCAQYFLDKIDVIKQADYVPSDQDLLRCRVLTSGLFETKFQVDKVNFMFDVGGQRDERRKWIQCFNDV |      |      |      |      |      |      |  |
|               | 920                                                                   | 930  | 940  | 950  | 960  | 970  | 980  |  |
| Human GNAS mR | IDCAQYFLDKIDVIKQADYVPSDQDLLRCRVLTSGLFETKFQVDKVNFMFDVGGQRDERRKWIQCFNDV | 241  |      |      |      |      |      |  |
| Mouse GNAS mR | IDCAQYFLDKIDVIKQADYVPSDQDLLRCRVLTSGLFETKFQVDKVNFMFDVGGQRDERRKWIQCFNDV | 2938 |      |      |      |      |      |  |
|               | TAIFVAVSSYNMVIREDNQTNRLQEALNLFKSIWNNRWLRTISVILFLNKQDLLAEKVLGKSKIEDY   |      |      |      |      |      |      |  |
|               | 990                                                                   | 1000 | 1010 | 1020 | 1030 | 1040 | 1050 |  |
| Human GNAS mR | TAIFVAVSSYNMVIREDNQTNRLQEALNLFKSIWNNRWLRTISVILFLNKQDLLAEKVLGKSKIEDY   | 311  |      |      |      |      |      |  |
| Mouse GNAS mR | TAIFVAVSSYNMVIREDNQTNRLQEALNLFKSIWNNRWLRTISVILFLNKQDLLAEKVLGKSKIEDY   | 3148 |      |      |      |      |      |  |

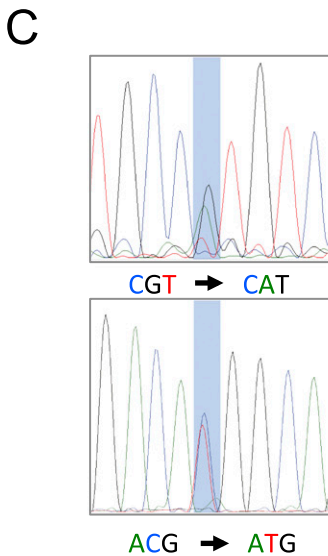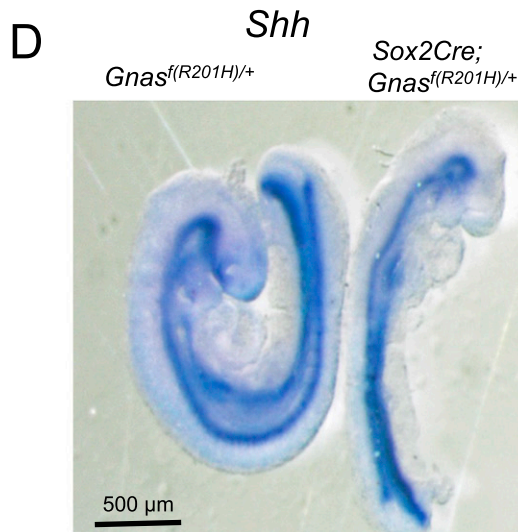

Fig. S2. (Continued)

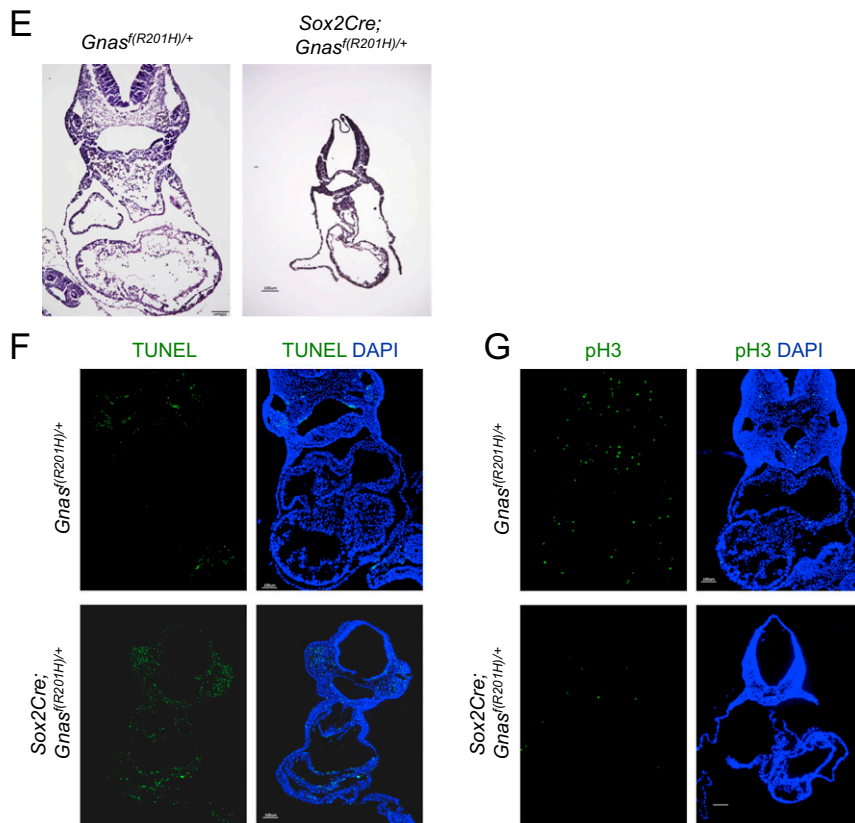

**Fig. S2.** Sequence identity between mouse and human *Gnas*. (A) Nucleotide sequence identity between mouse and human *Gnas* coding sequences. The yellow highlighted region indicates exon 8 nucleotide sequence, and the nucleotide highlighted in blue is the mutation site. (B) Sequence identity at the amino acid level in exons 7 (highlighted in yellow on left), 8 (not highlighted region; amino acid highlighted in blue is the site of mutation), and 9 (highlighted in yellow on right) between mouse and human GNAS protein. (C) Representative chromatogram of DNA sequencing of cDNA, prepared from total RNA isolated from an E10.5 *Sox2Cre; Gnas<sup>f(R201H)</sup>* embryo, showing a single-nucleotide base change. (D) Whole-mount mRNA in situ hybridization of *Shh* in E9.5 *Gnas<sup>(R201H)/+</sup>* littermate control and mutant embryos. (Scale bar, 500  $\mu$ m.) (E) Representative H&E staining of embryo sections at E10.5 showing retarded heart development of the mutant embryo. (F) Representative images of TUNEL staining in control and mutant embryo sections at E10.5. (G) Representative images of the proliferation marker pH3 in control and mutant embryos at E10.5. (Scale bars, 100  $\mu$ m.)





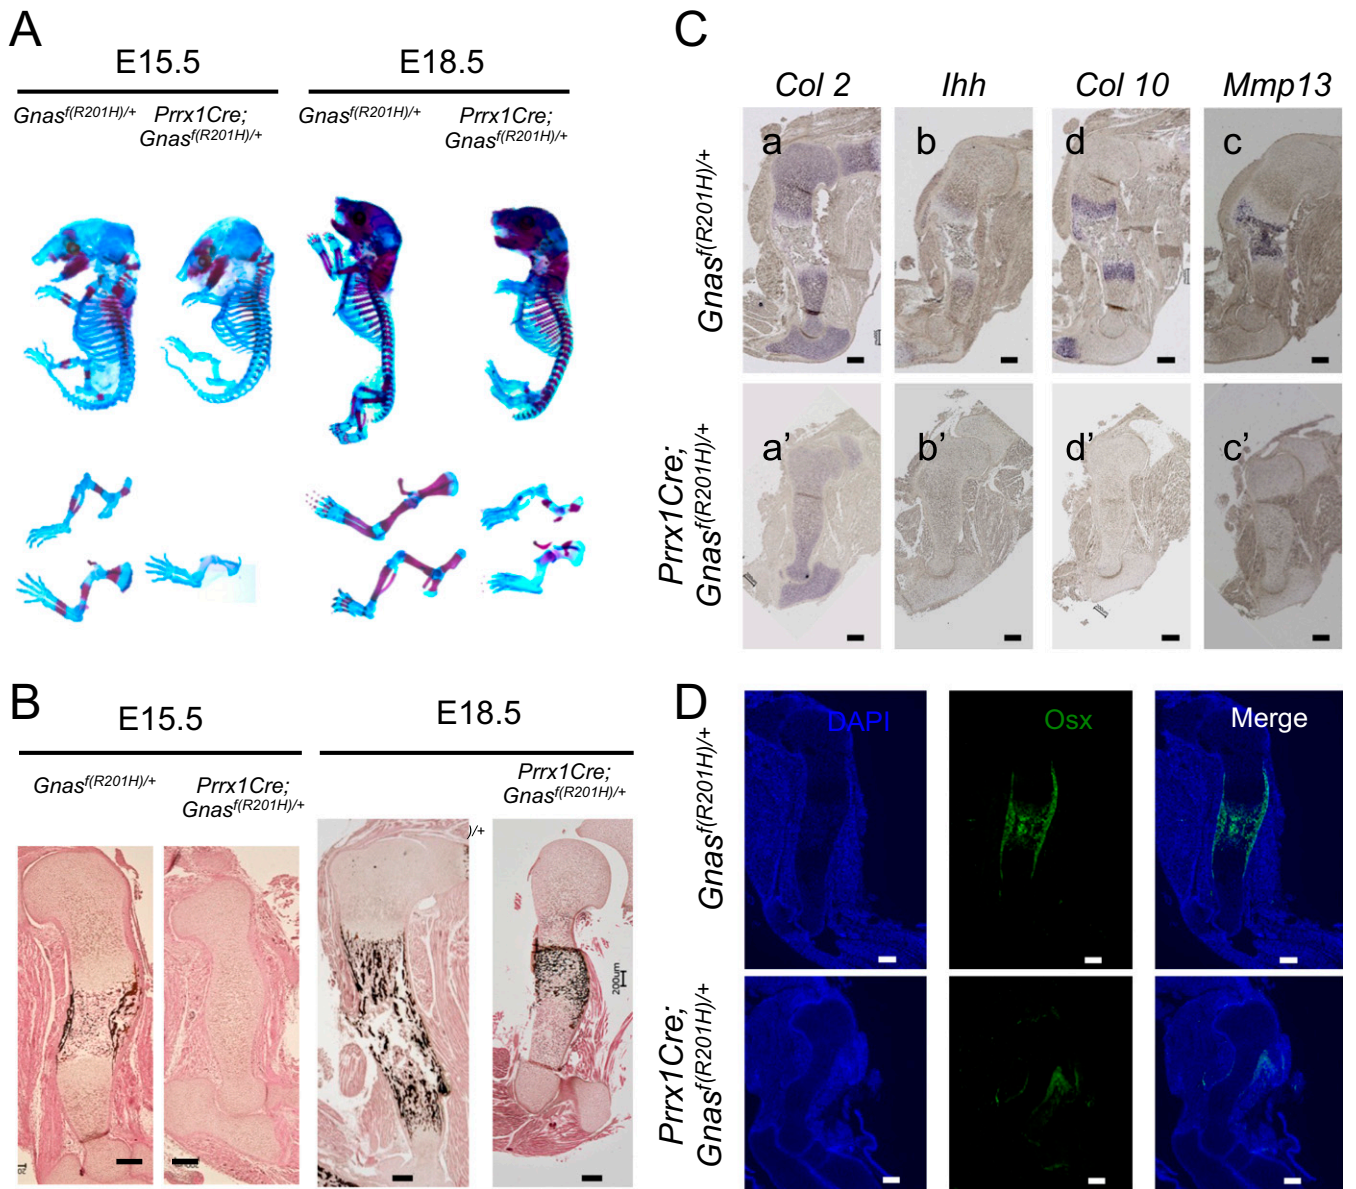

**Fig. 55.** *Prrx1-Cre; Gnas<sup>f(R201H)</sup>/+* mutant embryos recapitulate PTHrP/PTH receptor activation phenotypes. (A) Alcian blue and alizarin red staining of E15.5 and E18.5 whole embryonic skeleton. Mineralization is delayed in *Prrx1-Cre; Gnas<sup>f(R201H)</sup>/+* embryos compared with the *Gnas<sup>f(R201H)</sup>/+* littermate control. (Magnification: 5 $\times$ .) (B) von Kossa staining showing mineralization in E15.5 and E18.5 humerus sections. (C) In situ hybridization performed at E15.5 and E18.5 on humerus sections for *Collagen type 2 (Col2)*, *Ihh*, *Collagen type 10 (Col10)*, and *Mmp13* from control (a–c) and mutant (a'–c') embryos. (D) Immunofluorescence staining of *Osx* on E18.5 humerus sections. (Scale bars, 200  $\mu$ m.)







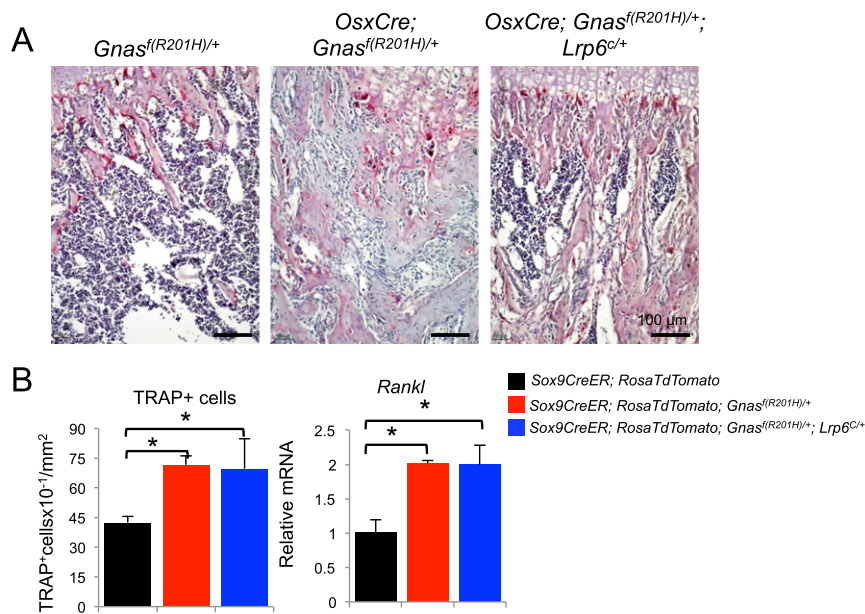

**Fig. S7.** Osteoclast differentiation was not rescued by *Lrp6* removal. (A) TRAP staining in the bone sections of littermate control [*Gnas<sup>f(R201H)</sup>*] and *OsxCre-Gnas<sup>f(R201H)</sup>* and *OsxCre-Gnas<sup>f(R201H)</sup>; Lrp6<sup>C/+</sup>* mutant mice. (Scale bar, 100  $\mu$ m.) (B) Quantification of TRAP<sup>+</sup> cells and qRT PCR analysis of *Rankl* from the RNA isolated from bone littermate control and mutant mice ( $n = 3$ ). \* $P < 0.05$ ; data are presented as mean  $\pm$  SD.

**Table S1. Sequences of primers used in this study**

| No. | Gene name                       | Forward primer, 5'–3'    | Reverse primer, 5'–3'     |
|-----|---------------------------------|--------------------------|---------------------------|
| 1   | <i><math>\beta</math>-Actin</i> | TGAGCGCGGCTACAGCTT       | TCCTTAATGTCACGCACGATTT    |
| 2   | <i>Axin2</i>                    | GAAGCTGGAGTTGGAGAGCCGCC  | TCTCTTTCATCCTCTCGGATCTGC  |
| 3   | <i>Tcf1</i>                     | ACATGAAGGAGATGAGAGCCA    | CTTCTCTTTCCGTAGTTATC      |
| 4   | <i>Ptch1</i>                    | CTCTGGAGCAGATTTCCAAGG    | TGCCGAGTTCTTTTGAATG       |
| 5   | <i>Gli1</i>                     | GAA AGTCTATTACGCCTTGA    | CAACCTTCTTGCTCACACATGTAAG |
| 6   | <i>Lef1</i>                     | TCTCAAGGACAGCAAAGCTC     | CACTTGAGGCTTCATGCACAT     |
| 7   | <i>Hip1</i>                     | GGGAAAACAGGTCATCAGC      | ATCCACCAACCAAAGGGC        |
| 8   | <i>Osx</i>                      | CCCACTGGCTCCTCGGTTCTCTCC | GCTGAAAGGTCAGCGTATGGCTTC  |
| 9   | <i>ALP</i>                      | CACGCGATGCAACCACTCAGG    | GCATGTCCCCGGGCTCAAAGA     |
| 10  | <i>Opn</i>                      | TACCGGCCACGCTACTTTCTTTAT | GACCGCCAGCTCGTTTTCATCC    |
| 11  | <i>Ocn</i>                      | ACCCTGGCTGCGCTCTGTCTCT   | GATGCGTTTTGTAGGCGGTCTTCA  |
